# Supplementary material
Source: PubMed Central journal article supplement (PMC8923939)
Supplement: NIHMS1774434-supplement-1.pdf [file NIHMS1774434-supplement-1.pdf]

**Supplemental Table 1.** 18-county rural region encompassed by LSPAN program.

| <b>County</b> | <b>Age 55-74</b> | <b>Smoking Status Yes</b> | <b>Medicare Enrolled</b> | <b>Low Income Un-/Underinsured</b> | <b>MUA</b> | <b>HPSA</b> |
|---------------|------------------|---------------------------|--------------------------|------------------------------------|------------|-------------|
| Bosque        | 7,170            | 1,060                     | 588                      | 127                                | Yes        | Yes         |
| Brown         | 12,346           | 1,996                     | 1,103                    | 187                                | Yes        | Yes         |
| Comanche      | 4,619            | 758                       | 415                      | 111                                | Yes        | Yes         |
| Denton        | 140,792          | 19,710                    | 75,781                   | 2,675                              | Yes        | Yes         |
| Eastland      | 6,279            | 1,044                     | 569                      | 109                                | Yes        | Yes         |
| Erath         | 9,190            | 1,612                     | 853                      | 202                                | Yes        | No          |
| Hamilton      | 3,003            | 435                       | 213                      | 78                                 | Yes        | No          |
| Hood          | 22,463           | 3,096                     | 1,770                    | 277                                | No         | No          |
| Jack          | 2,644            | 434                       | 201                      | 67                                 | Yes        | Yes         |
| Johnson       | 43,091           | 6,576                     | 3,126                    | 712                                | Partial    | No          |
| Mills         | 1,678            | 238                       | 140                      | 31                                 | Yes        | Yes         |
| Palo Pinto    | 9,739            | 1,645                     | 786                      | 274                                | Partial    | Yes         |
| Parker        | 39,334           | 5,717                     | 2,518                    | 656                                | No         | No          |
| Somervell     | 2,935            | 431                       | 199                      | 62                                 | No         | No          |
| Stephens      | 3,010            | 502                       | 244                      | 85                                 | Yes        | Yes         |
| Tarrant       | 409,090          | 58,515                    | 24,789                   | 6,682                              | Partial    | Partial     |
| Wise          | 16,199           | 2,430                     | 9,944                    | 81                                 | No         | Yes         |
| Young         | 5,876            | 904                       | 462                      | 106                                | Yes        | Yes         |
| <b>Total</b>  | <b>739,458</b>   | <b>107,103</b>            | <b>123,701</b>           | <b>12,522</b>                      |            |             |

HPSA, health professional shortage area; MUA, medically underserved area

Supplemental Materials. LSPAN lung cancer screening referral form

|                                                                                                                                                                                                                                                                                 |                                                                      |                                                                             |
|---------------------------------------------------------------------------------------------------------------------------------------------------------------------------------------------------------------------------------------------------------------------------------|----------------------------------------------------------------------|-----------------------------------------------------------------------------|
|  <p>MONCRIEF<br/>CANCER<br/>INSTITUTE<br/>UTSouthwestern</p>                                                                                                                                   | <b>REFERRAL ORDER FOR<br/>LUNG CANCER SCREENING</b>                  | DATE _____                                                                  |
| <b>PATIENT DEMOGRAPHICS</b>                                                                                                                                                                                                                                                     |                                                                      |                                                                             |
| FIRST NAME _____                                                                                                                                                                                                                                                                | MI _____                                                             | LAST NAME _____ DOB _____                                                   |
| PREFERRED LANGUAGE _____                                                                                                                                                                                                                                                        | GENDER <input type="checkbox"/> MALE <input type="checkbox"/> FEMALE | HT _____ WT _____                                                           |
| ADDRESS _____                                                                                                                                                                                                                                                                   |                                                                      |                                                                             |
| CITY _____                                                                                                                                                                                                                                                                      | STATE TX _____                                                       | ZIP CODE _____ COUNTY _____                                                 |
| HOME PHONE _____                                                                                                                                                                                                                                                                | CELL PHONE _____                                                     | WORK PHONE _____                                                            |
| <b>SMOKING HISTORY</b>                                                                                                                                                                                                                                                          |                                                                      |                                                                             |
| Current Smoker <input type="checkbox"/> YES <input type="checkbox"/> NO*                                                                                                                                                                                                        | *If former smoker, number of years since quitting _____              |                                                                             |
| Number of Packs per Day _____                                                                                                                                                                                                                                                   | X                                                                    | Number of Years Smoked _____ = _____ Pack-Years<br>(1 pack = 20 cigarettes) |
| Does the patient show any clinical signs or symptoms of lung cancer?                                                                                                                                                                                                            | <input type="checkbox"/> YES                                         | <input type="checkbox"/> NO                                                 |
| Has the patient had a CT chest scan performed within the past year?                                                                                                                                                                                                             | <input type="checkbox"/> YES                                         | <input type="checkbox"/> NO                                                 |
| Is the patient 55 to 74 years old?                                                                                                                                                                                                                                              | <input type="checkbox"/> YES                                         | <input type="checkbox"/> NO                                                 |
| Does the patient have Medicare coverage or third-party insurance?                                                                                                                                                                                                               | <input type="checkbox"/> YES                                         | <input type="checkbox"/> NO                                                 |
| <b>SHARED-DECISION MAKING</b> By signing this order, you are certifying:                                                                                                                                                                                                        |                                                                      |                                                                             |
| <input type="checkbox"/> The patient has participated in a shared decision-making visit which discussed benefits and harms of screening, follow-up diagnostic testing, over-diagnosis, false positive rate, and total radiation exposure.                                       |                                                                      |                                                                             |
| <input type="checkbox"/> The patient was informed of the importance of adherence to annual lung cancer LDCT screening, impact of co-morbidities, and ability or willingness to undergo diagnosis and treatment.                                                                 |                                                                      |                                                                             |
| <input type="checkbox"/> The patient was informed of the importance of maintaining cigarette smoking abstinence if former smoker; or the importance of smoking cessation if current smoker, and was provided information about tobacco cessation interventions, as appropriate. |                                                                      |                                                                             |
| <b>REFER TO MONCRIEF CANCER INSTITUTE FOR LUNG CANCER SCREENING USING LOW DOSE CT SCAN (LDCT)</b>                                                                                                                                                                               |                                                                      |                                                                             |
| <ul style="list-style-type: none"><li>• G0297 – Low dose CT scan (LDCT) for lung cancer screening (Initial)</li><li>• ICD-10 Z87.891 (personal history of tobacco use/personal history of nicotine dependence), ICD-9 diagnosis code V15.82</li></ul>                           |                                                                      |                                                                             |
| REFERRING PROVIDER _____                                                                                                                                                                                                                                                        | NPI _____                                                            |                                                                             |
| CLINIC ADDRESS _____                                                                                                                                                                                                                                                            |                                                                      |                                                                             |
| Fax order to 817-288-0097, or email to <a href="mailto:lungscreening@moncrief.com">lungscreening@moncrief.com</a>                                                                                                                                                               |                                                                      |                                                                             |
| Rev. 5.8.18                                                                                                                                                                                                                                                                     |                                                                      |                                                                             |
